# Supplementary material for: T Cells of Infants Are Mature, but Hyporeactive Due to Limited Ca2+ Influx
Source: PLoS One. 2016 Nov 28;11(11):e0166633. doi: 10.1371/journal.pone.0166633 (PMC5125607; doi:10.1371/journal.pone.0166633)
Supplement: S8 Table — (DOCX) [file pone.0166633.s017.docx]

## S8 Table

**Summary of significant differences of the Tukey test in the Ca2+ influx responses (*) of infants (ages in months: 1-2, 3-5 or 6-66) compared to CB and adults of the CD4+ T cells subgroups depend on anti-CD28 Ab stimulation.**

|  | T cell subset | anti-CD3 Ab concentration 0.005 μg/ml | | | | | | | | | |
| --- | --- | --- | --- | --- | --- | --- | --- | --- | --- | --- | --- |
|  |  |  | CB | | | Adult | | | Infant | | |
| Adult | Infant1-2 | Infant 3-5 | Infant 6-66 | Infant 1-2 | Infant 3-5 | Infant 6-66 | 1-2  Infant 3-5 | 3-5  Infant  6-66 | 1-2  Infant  6-66 |
| anti-CD3/anti-CD28 Ab | CD31+ | **-** | **-** | **-** | **-** | ***** | ***** | ***** | **-** | **-** | **-** |
| CD31- | **-** | **-** | **-** | **-** | ***** | **-** | ***** | **-** | **-** | **-** |
| CD45RA+ | **-** | **-** | **-** | **-** | ***** | **-** | ***** | **-** | **-** | **-** |
| CD45RA- | **-** | **-** | **-** | **-** | **-** | **-** | **-** | **-** | **-** | **-** |
| CD4+ | **-** | **-** | **-** | **-** | ***** | **-** | ***** | **-** | **-** | **-** |
| CD4- | **-** | **-** | **-** | **-** | **-** | **-** | **-** | **-** | **-** | **-** |
| anti-CD3 Ab | CD31+ | **-** | **-** | **-** | **-** | **-** | **-** | **-** | **-** | **-** | **-** |
| CD31- | **-** | **-** | **-** | **-** | **-** | **-** | **-** | **-** | **-** | **-** |
| CD45RA+ | **-** | **-** | **-** | **-** | **-** | **-** | **-** | **-** | **-** | **-** |
| CD45RA- | **-** | **-** | **-** | **-** | **-** | **-** | **-** | **-** | **-** | **-** |
| CD4+ | **-** | **-** | **-** | ***** | **-** | **-** | **-** | **-** | **-** | **-** |
| CD4- | **-** | **-** | **-** | **-** | **-** | ***** | **-** | **-** | **-** | **-** |

|  | T cell subset | anti-CD3 Ab concentration 0.05 μg/ml | | | | | | | | | |
| --- | --- | --- | --- | --- | --- | --- | --- | --- | --- | --- | --- |
|  |  |  | CB | | | Adult | | | Infant | | |
| Adult | Infant1-2 | Infant 3-5 | Infant 6-66 | Infant 1-2 | Infant 3-5 | Infant 6-66 | 1-2  Infant 3-5 | 3-5  Infant  6-66 | 1-2  Infant  6-66 |
| anti-CD3/anti-CD28 Ab | CD31+ | **-** | ***** | ***** | ***** | **-** | ***** | ***** | ***** | ***** | **-** |
| CD31- | **-** | ***** | ***** | **-** | **-** | ***** | **-** | **-** | **-** | **-** |
| CD45RA+ | **-** | **-** | ***** | ***** | **-** | ***** | **-** | **-** | **-** | **-** |
| CD45RA- | **-** | **-** | ***** | **-** | **-** | **-** | **-** | **-** | **-** | **-** |
| CD4+ | **-** | **-** | ***** | ***** | **-** | ***** | **-** | **-** | **-** | **-** |
| CD4- | **-** | **-** | **-** | **-** | **-** | **-** | **-** | **-** | **-** | **-** |
| anti-CD3 Ab | CD31+ | ***** | ***** | ***** | ***** | **-** | ***** | **-** | **-** | **-** | **-** |
| CD31- | **-** | ***** | ***** | ***** | **-** | **-** | **-** | **-** | **-** | **-** |
| CD45RA+ | **-** | **-** | ***** | ***** | **-** | ***** | **-** | **-** | **-** | **-** |
| CD45RA- | ***** | ***** | ***** | **-** | **-** | **-** | **-** | **-** | **-** | **-** |
| CD4+ | ***** | **-** | ***** | ***** | **-** | **-** | **-** | **-** | **-** | **-** |
| CD4- | **-** | **-** | **-** | **-** | **-** | **-** | **-** | **-** | **-** | **-** |

|  | T cell subset | anti-CD3 Ab concentration 0.5 μg/ml | | | | | | | | | |
| --- | --- | --- | --- | --- | --- | --- | --- | --- | --- | --- | --- |
|  |  |  | CB | | | Adult | | | Infant | | |
| Adult | Infant1-2 | Infant 3-5 | Infant 6-66 | Infant 1-2 | Infant 3-5 | Infant 6-66 | 1-2  Infant 3-5 | 3-5  Infant  6-66 | 1-2  Infant  6-66 |
| anti-CD3/anti-CD28 Ab | CD31+ | **-** | **-** | ***** | **-** | **-** | ***** | **-** | ***** | ***** | **-** |
| CD31- | **-** | **-** | ***** | **-** | **-** | ***** | **-** | ***** | ***** | **-** |
| CD45RA+ | **-** | **-** | ***** | **-** | **-** | ***** | **-** | **-** | ***** | **-** |
| CD45RA- | **-** | **-** | ***** | **-** | **-** | ***** | **-** | **-** | ***** | **-** |
| CD4+ | **-** | **-** | ***** | **-** | **-** | **-** | **-** | **-** | ***** | **-** |
| CD4- | **-** | **-** | **-** | **-** | **-** | **-** | **-** | **-** | **-** | **-** |
| anti-CD3 Ab | CD31+ | **-** | **-** | ***** | ***** | **-** | ***** | **-** | **-** | **-** | **-** |
| CD31- | **-** | **-** | ***** | **-** | **-** | **-** | **-** | **-** | **-** | **-** |
| CD45RA+ | **-** | **-** | ***** | **-** | **-** | **-** | **-** | **-** | **-** | **-** |
| CD45RA- | **-** | ***** | ***** | ***** | **-** | **-** | **-** | **-** | **-** | **-** |
| CD4+ | **-** | **-** | ***** | **-** | **-** | **-** | **-** | **-** | **-** | **-** |
| CD4- | **-** | **-** | **-** | **-** | **-** | **-** | **-** | **-** | **-** | **-** |

Stochastic comparisons of the data were performed with ANOVA, which was performed as two-tailed tests followed by the Tukey-Kramer post-hoc test. The star (*) indicates pairwise significance (*p*≤0.05). CD4+CD45RA+CD31+=CD31+; CD4+CD45RA+CD31-= CD31-; CD4+CD45RA+= CD45RA+; CD4+CD45RA- = CD45RA-; CD4+ = CD4+; CD4- = CD4-; infant age in months.
